# Supplementary material for: Corporate political activity of major food companies in Thailand: an assessment and policy recommendations
Source: Springer Nature journal article supplement (doi:10.1186/s12992-018-0432-z), 2018-11-22
Supplement: MOESM1 [file 16288698]

## Additional file 1: Description of CPA strategies

| <b>CPA: corporate political activity of the food industry</b>            |                                                                      |                                                                                                                                         |                                                                                                      |
|--------------------------------------------------------------------------|----------------------------------------------------------------------|-----------------------------------------------------------------------------------------------------------------------------------------|------------------------------------------------------------------------------------------------------|
| <b>Strategies</b>                                                        | <b>Practices</b>                                                     | <b>Mechanisms</b>                                                                                                                       |                                                                                                      |
| 1.Information and messaging                                              | 1.1 Lobby policy makers                                              | 1.Lobby directly and indirectly (through third parties) to influence legislation and regulation so that it is favorable to the industry |                                                                                                      |
|                                                                          | 1.2 Stress the economic importance of the industry                   | 1. Stress the number of jobs supported and the money generated for the economy                                                          |                                                                                                      |
|                                                                          | 1.3 Promote deregulation                                             |                                                                                                                                         | 1. Highlight the potential burden associated with regulation (losses of jobs, administrative burden) |
|                                                                          |                                                                      |                                                                                                                                         | 2. Demonize the 'nanny state'                                                                        |
|                                                                          |                                                                      |                                                                                                                                         | 3. Threaten to withdraw investments if new public health policies are introduced                     |
|                                                                          | 1.4 Frame the debate on diet- and public health-related issues       |                                                                                                                                         | 1. Shift the blame away from the food industry, e.g. focus on individual responsibility              |
|                                                                          |                                                                      |                                                                                                                                         | 2. Promote the good intentions and stress the good traits of the food industry                       |
|                                                                          |                                                                      |                                                                                                                                         | 3. Emphasize the food industry's actions to address public health-related issues                     |
|                                                                          | 1.5 Shape the evidence base on diet and public health-related issues |                                                                                                                                         | 1. Fund research, including through academics, research institutions and front groups                |
|                                                                          |                                                                      |                                                                                                                                         | 2. Pay scientists as advisers, consultants or spokespersons                                          |
|                                                                          |                                                                      |                                                                                                                                         | 3. Cherry pick data that favors the industry                                                         |
|                                                                          |                                                                      |                                                                                                                                         | 4. Disseminate and use non-peer reviewed or unpublished evidence                                     |
|                                                                          |                                                                      |                                                                                                                                         | 5. Participate in and host scientific events                                                         |
|                                                                          |                                                                      |                                                                                                                                         | 6. Provide industry-sponsored education*                                                             |
|                                                                          |                                                                      |                                                                                                                                         | 7. Suppress or influence the dissemination of research                                               |
| 8. Emphasize disagreement among scientists and focus on doubt in science |                                                                      |                                                                                                                                         |                                                                                                      |
| 9. Criticize evidence and emphasize its complexity and uncertainty       |                                                                      |                                                                                                                                         |                                                                                                      |

| CPA: corporate political activity of the food industry                           |                                                                                   |                                                                                                                           |
|----------------------------------------------------------------------------------|-----------------------------------------------------------------------------------|---------------------------------------------------------------------------------------------------------------------------|
| Strategies                                                                       | Practices                                                                         | Mechanisms                                                                                                                |
| 2. Financial incentive                                                           | 2.1 Fund and provide financial incentives to political parties and policymakers   | 1. Provide donations, gifts, entertainment or other financial inducements                                                 |
| 3. Constituency building                                                         | 3.1 Establish relationships with key opinion leaders and health organizations     | 1. Promote public-private interactions, including philanthropic, transactional and transformational relationships         |
|                                                                                  |                                                                                   | 2. Support professional organizations through funding and/or advertising in their publications                            |
|                                                                                  |                                                                                   | 3. Establish informal relationships with key opinion leaders                                                              |
|                                                                                  | 3.2 Seek involvement in the community                                             | 1. Undertake corporate philanthropy                                                                                       |
|                                                                                  |                                                                                   | 2. Support physical activity initiatives                                                                                  |
|                                                                                  |                                                                                   | 3. Support events (such as for youth or the arts) and community-level initiatives                                         |
|                                                                                  | 3.3 Establish relationships with policymakers                                     | 1. Seek involvement in working groups, technical groups and advisory groups                                               |
|                                                                                  |                                                                                   | 2. Provide technical support and advice to policymakers                                                                   |
|                                                                                  |                                                                                   | 3. Use the 'revolving door', e.g. ex-food industry staff work in government organizations and vice versa                  |
|                                                                                  |                                                                                   | 4. Use relatives who work in government or political party*                                                               |
|                                                                                  |                                                                                   | 5. Participate in public-private interactions, including philanthropic, transactional and transformational relationships* |
|                                                                                  | 3.4 Establish relationships with the media                                        | 1. Establish close relationships with media organizations, journalists and bloggers to facilitate media advocacy          |
| 2. Pay for individual journalists to protect their cooperate image and interest* |                                                                                   |                                                                                                                           |
| 4. Legal                                                                         | 4.1 Use legal action (or the threat thereof) against public policies or opponents | 1. Litigate or threaten to litigate against governments, organizations or individuals                                     |

| <b>CPA: corporate political activity of the food industry</b>                          |                                                                  |                                                                                                                                                                                                            |
|----------------------------------------------------------------------------------------|------------------------------------------------------------------|------------------------------------------------------------------------------------------------------------------------------------------------------------------------------------------------------------|
| <b>Strategies</b>                                                                      | <b>Practices</b>                                                 | <b>Mechanisms</b>                                                                                                                                                                                          |
|                                                                                        | 4.2 Influence the development of trade and investment agreements | 1. Influence the development of trade and investment agreements such that clauses favorable to the industry are included (e.g. limited trade restrictions, mechanisms for corporations to sue governments) |
| 5. Policy substitution                                                                 | 5.1 Develop and promote alternatives to policies                 | 1. Develop and promote voluntary codes, self-regulation and non-regulatory initiatives                                                                                                                     |
| 6. Opposition fragmentation and destabilization                                        | 6.1 Criticize public health advocates                            | 1. Criticize public health advocates personally and publicly, e.g. through the media, blogs                                                                                                                |
|                                                                                        | 6.2 Create multiple voices against public health measures        | 1. Establish fake grassroots organizations ('astroturfing')                                                                                                                                                |
|                                                                                        |                                                                  | 2. Procure the support of community and business groups to oppose public health measures                                                                                                                   |
| 6.3 Infiltrate, monitor and distract public health advocates, groups and organizations |                                                                  | 1. Monitor the operations and advocacy strategies of public health advocates, groups and organizations                                                                                                     |
|                                                                                        |                                                                  | 2. Support the placement of industry-friendly personnel within health organizations                                                                                                                        |

\*New mechanisms identified specific to Thai context
